# Supplementary material for: Effect of Drinking Water Distribution System Design on Antimicrobial Delivery to Pigs
Source: MDPI journal article supplement (doi:10.3390/ani11082362), 2021-08-10
Supplement: s1 [file animals-1291887-supplementary.pdf › animals-1291887-supplementary.pdf]

Effect of drinking water distribution system design on antimicrobial delivery to pigs  
Stephen Little, Andrew Woodward, Glenn Browning and Helen Billman-Jacobe

**Table S1.** Hydraulic settings and properties of pipes, nodes, reservoirs and pumps used in EPANET simulations.

| Setting:                              | Value:         |
|---------------------------------------|----------------|
| Default hydraulic settings:           |                |
| Flow units                            | L/sec          |
| Headloss formula                      | Darcy-Weisbach |
| Specific gravity                      | 1              |
| Relative viscosity                    | 1              |
| Maximum trials                        | 40             |
| Accuracy                              | 0.001          |
| Demand multiplier - Studies 1a and 1b | 0.0000427      |
| Demand multiplier - Studies 2a and 2b | 0.0000552      |
| Main pipes:                           |                |
| Diameter                              | 50mm           |
| Roughness                             | 0.1            |
| Loss coefficient                      | 0              |
| Drinker nodes:                        |                |
| Elevation                             | 0              |
| Base demand – Studies 1a and 1b       | 36             |
| Base demand – Studies 2a and 2b       | 50             |
| Reservoir:                            |                |
| Total head                            | 15             |
| Circulator pump:                      |                |
| Flow:                                 | Head:          |
| 0                                     | 8.3            |
| 0.5                                   | 7.6            |
| 1                                     | 6.6            |
| 1.5                                   | 5.2            |
| 2                                     | 3.65           |
| 2.6                                   | 1.6            |
| Throttle control valve:               |                |
| Diameter                              | 50mm           |
| Type                                  | TCV            |
| Setting                               | 4000           |
| Loss coefficient                      | 0.5            |
